# Supplementary material for: Cation Effect in the Corrosion Inhibition Properties of Coumarate Ionic Liquids and Acrylic UV-Coatings
Source: PubMed Central journal article supplement (PMC7694658; doi:10.3390/polym12112611), 2020-11-06
Supplement: polymers-12-02611-s001.pdf [file polymers-12-02611-s001.pdf]

Article

# Cation Effect in the Corrosion Inhibition Properties of Coumarate based poly(ionic liquid)s

Esther Udabe <sup>1</sup>, Anthony Somers <sup>2</sup>, Maria Forsyth <sup>1,2,3,\*</sup> and David Mecerreyes <sup>1,3,\*</sup>

<sup>1</sup> POLYMAT University of the Basque Country UPV/EHU, Donostia-San Sebastian 20018, Spain;

<sup>2</sup> Institute for Frontier Materials, Deakin University, Geelong, Victoria, 3220, Australia,

<sup>3</sup> IKERBASQUE Basque Foundation for Science, Bilbao, Spain

\* Correspondence: (M.F.) [maria.forsyth@deakin.edu.au](mailto:maria.forsyth@deakin.edu.au); (D.M.) [david.mecerreyes@ehu.es](mailto:david.mecerreyes@ehu.es)

Received: date; Accepted: date; Published: date

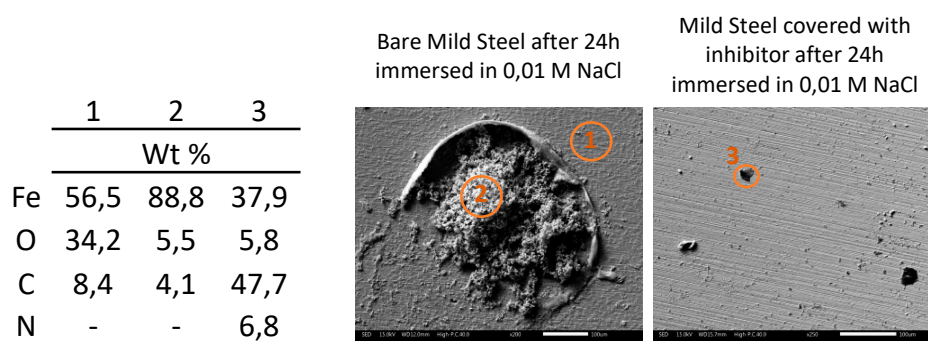

**Figure S1.** EDS data of 3 different zones (1: mild steel surface; 2: Rust deposits; 3: inhibitor deposits) bare mild steel and mild steel covered with inhibitor after 24h immersed in 0,01M NaCl.

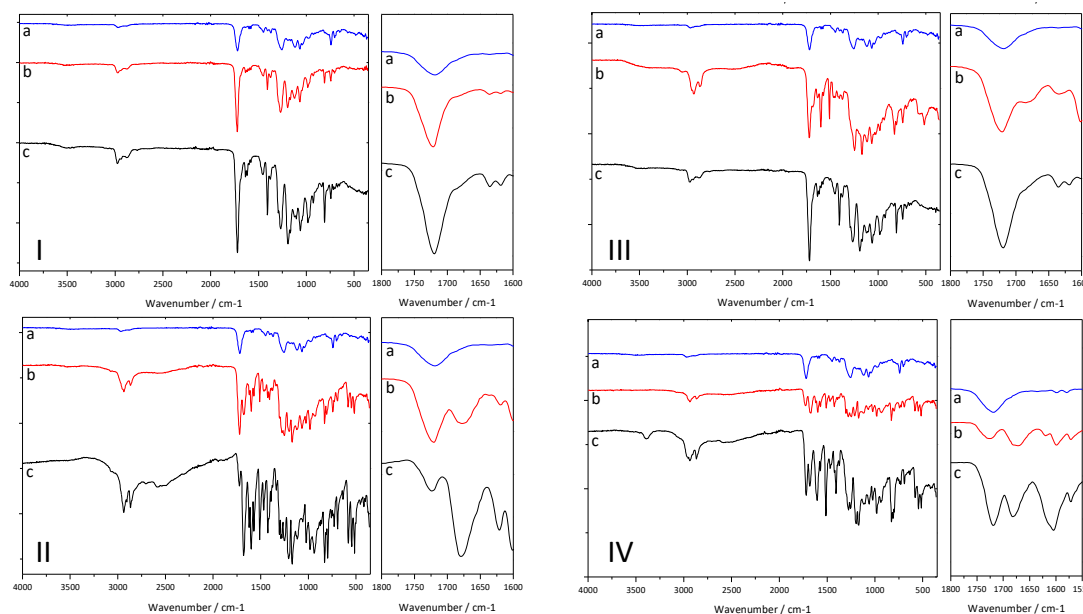

**Figure S2.** ATR-FTIR of inhibitors based monomer mixture (c) and coatings (b) compared to the control coating (a). I: [DMAEM+ HexOCou-]; II: [VIm+ HexOCou-]; III: [VAn+ HexOCou-]; IV: [VPy+ HexOCou-].

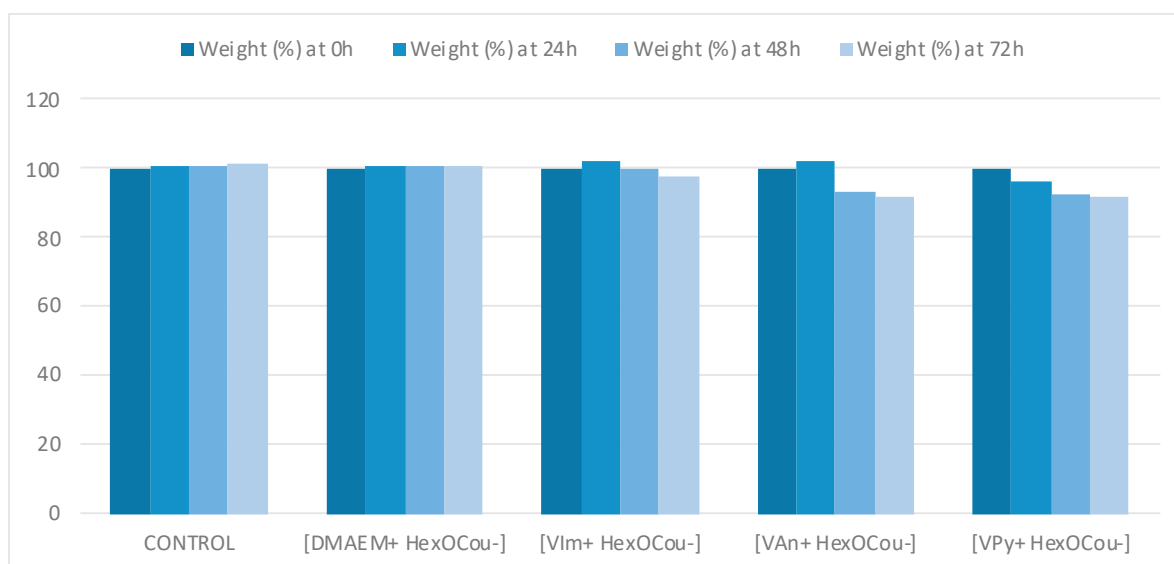

**Figure S3.** Swelling test of polymer coatings. Weight of polymers after 24h, 48h and 72h immersion in water.

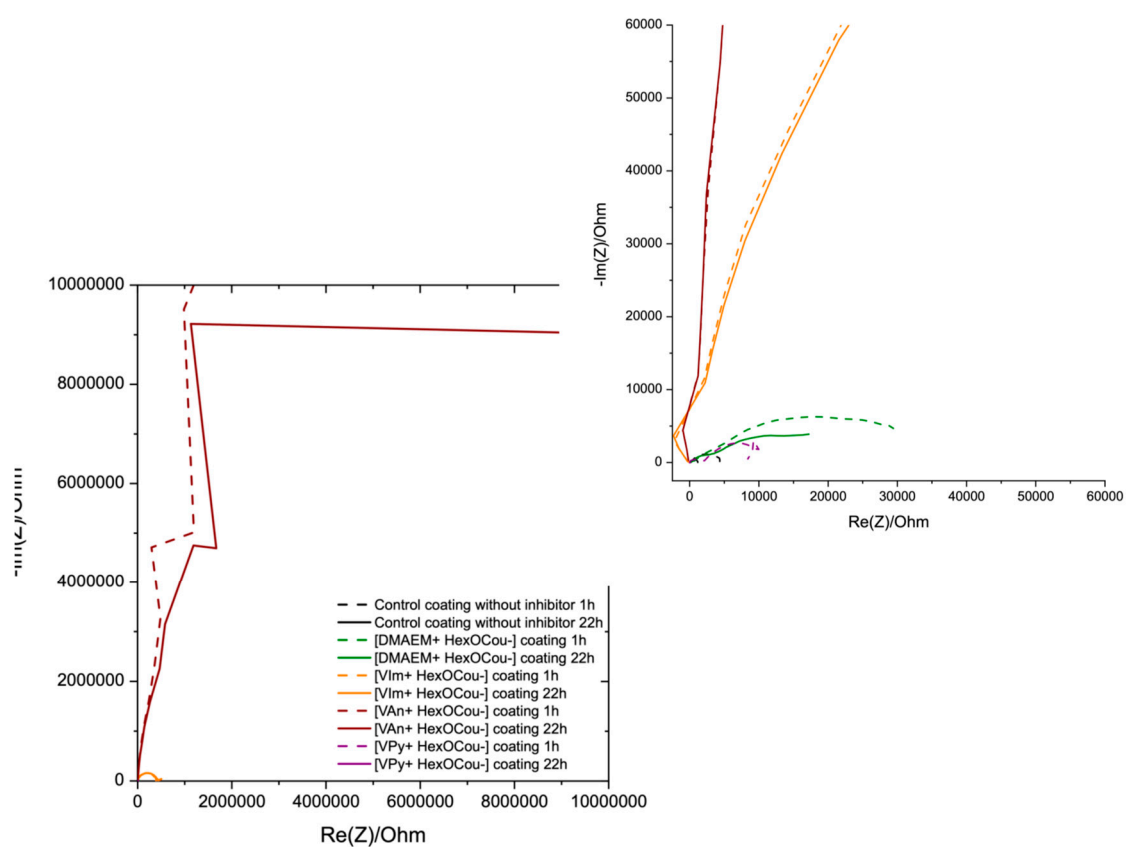

**Figure S4.** Nyquist plot of polymer coating on AS1020 mild steel containing 20% of [DMAEM+ HexOCou-] (green), 20% of [VIm+ HexOCou-] (orange), 20% of [VAn+ HexOCou-] (wine), 20% of [VPy+ HexOCou-] (purple) and control (black) immersed in 0.005M NaCl after 22h

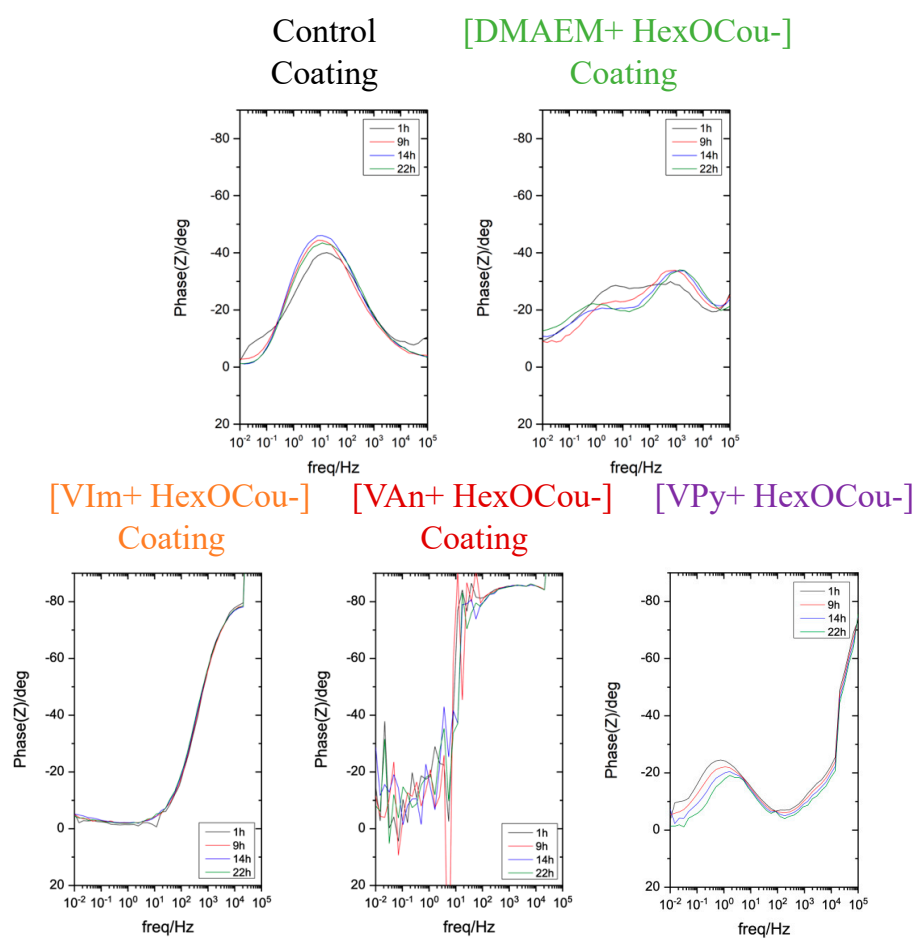

**Figure S5.** Electrochemical impedance spectra of different polymer coatings on AS1020 mild steel immersed in 0.005M NaCl at different immersion times: phase angle plots for control, inhibited coating containing 20% [DMAEM+ HexOCou-]; inhibited coating containing 20% [VIm+ HexOCou-]; inhibited coating containing 20% [VAN+ HexOCou-]; inhibited coating containing 20% [VPy+ HexOCou-]
